# Supplementary material
Source: publisher figshare collection journal article supplement (https://acs.figshare.com/ndownloader/files/9198451)
Supplement: Supplementary file 1 [file 9198451]

## **Electronic Supporting Information**

### **Infrared spectroscopy coupled with a dispersion model for quantifying the real-time dynamics of kanamycin resistance in artificial microbiota**

Naifu Jin<sup>1</sup>, Maria Paraskevaidi<sup>2</sup>, Kirk T Semple<sup>1</sup>, Francis L. Martin<sup>2,\*</sup>, Dayi Zhang<sup>1,\*</sup>

<sup>1</sup> Lancaster Environment Centre, Lancaster University, Lancaster LA1 4YQ, UK

<sup>2</sup> School of Pharmacy and Biomedical Sciences, University of Central Lancashire, Preston PR1 2HE, UK

No. of Pages = 7

No. of Figures = 3

No. of Tables = 1

# 1. Materials and Methods

## 1.1 Dispersion indicator model

The initial spectral dataset is an ensemble of multivariate observations partitioned into  $M$  distinct groups (different microbiota composition in this study). For the  $n_m$  observation in each group ( $m$  runs from 1 to  $M$  and refers to the  $m^{\text{th}}$  group). The multivariate observation vectors can be written as  $y_{mi}$  where  $i$  is the  $i^{\text{th}}$  observation. To search for the linear combination in LDA that optimally separates our multivariate observation into  $M$  groups<sup>1</sup>, the linear transformation of  $y_{mi}$  is written as  $z_{mi}$ :

$$z_{mi} = w^T y_{mi} \quad (1)$$

Here,  $w^T$  represents the linear transformation matrix, and the mean of the  $m^{\text{th}}$  group of the transformed data ( $\langle z_m \rangle$ ) is:

$$\langle z_m \rangle = w^T \langle y_m \rangle \quad (2)$$

where  $y_m$  is the mean of the observations within a group and defined as:

$$\langle y_m \rangle = \sum_{j=1}^{n_m} y_{mj} / n_m \quad (3)$$

The dispersion among groups ( $B$ ) and within groups ( $E$ ) are defined in the following equations:

$$B_y = \sum_{m=1}^G n_m (\langle y_{mi} \rangle - \langle y \rangle) (\langle y_{mi} \rangle - \langle y \rangle)^T \quad (4)$$

$$E_y = \sum_{m=1}^G n_g \sum_{j=1}^{n_m} (\langle y_{mi} \rangle - \langle y_m \rangle) (\langle y_{mi} \rangle - \langle y_m \rangle)^T \quad (5)$$

where  $\langle y \rangle = \frac{1}{M} \sum_{m=1}^G \frac{1}{n_m} \sum_{j=1}^{n_m} y_{mj}$  is the total average of the dataset. Using Fisher's linear discriminant, the optimal linear regression in PCA-LDA is to find the vector  $w$  maximizing  $\lambda$  (the rate of between-groups sum of squares to within-groups sum of squares):

$$\lambda = \frac{w^T B_y w}{w^T E_y w} \quad (6)$$

The solutions of Equation (6) are the eigenvalues  $|\lambda|$ , which are associated to the eigenvectors  $|w|$ . In the most cases, the first two ranked  $\lambda_1$  and  $\lambda_2$  account for the most of  $|\lambda|$ , and the discriminant functions are obtained as LD1 ( $z_1 = w_1^T Y$ ) and LD2 ( $z_2 = w_2^T Y$ ) to represent the spectra variables of each community.

To predict the composition of the artificial microbiota, the three control groups (*A. baylyi* [a], *E. coli* [b] and *M. vanbaalenii* [c]) are set as the reference classes. The dispersions of the among groups (B) and within groups (E) (Fig. 2B) are defined in the following equations:

$$O_{y,q}|(q = a, b, c) = w^T B'_{y,q} w = w^T \left\{ \sum_{i=1}^M \sum_{j=1}^M n_m (\langle y_{mi} \rangle - \langle y_{qj} \rangle) (\langle y_{mi} \rangle - \langle y_{qj} \rangle)^T \right\} w = \sum_{i=1}^M \sum_{j=1}^M n_g (\langle w^T y_{mi} \rangle - \langle w^T y_{qj} \rangle) (\langle w^T y_{mi} \rangle - \langle w^T y_{qj} \rangle)^T = \sum_{i=1}^M \sum_{j=1}^M n_g (\langle z_{mi} \rangle - \langle z_{qi} \rangle) (\langle z_{mi} \rangle - \langle z_{qi} \rangle)^T \quad (7)$$

$$T_y = w^T E'_y w = \sum_{q=a,b,c} \sum_{i=1}^M \sum_{j=1}^M n_g (\langle z_{mi} \rangle - \langle z_{qj} \rangle) (\langle z_{gi} \rangle - \langle z_{qj} \rangle)^T \quad (8)$$

Here, we introduced the dispersion indicator ( $D_I$ ) to calculate the composition of antibiotic resistance bacteria (*A. baylyi*) within the community, defined as:

$$D_I = \frac{O_{y,a}}{T_y} \quad (9)$$

$$\sum_{q=a,b,c} D_{I,q} = \frac{O_{y,q}}{T_y} = 100\% \quad (10)$$

## Reference:

(1) Ami, D.; Mereghetti, P.; Doglia, S. M. *Multivariate analysis for Fourier transform infrared spectra of complex biological systems and processes*; INTECH Open Access Publisher, 2013.

**Table S1.** Significant peaks derived from cluster vectors of artificial microbiota.

| Microbiota            | Significant peaks (cm <sup>-1</sup> ) |
|-----------------------|---------------------------------------|
| <i>A. baylyi</i>      | 1188, 1242, 1508, 1547, 1659, 1744    |
| <i>E. coli</i>        | 980, 1034, 1501, 1562, 1616, 1740     |
| <i>M. vanbaalenii</i> | 1065, 1134, 1192, 1377, 1582, 1744    |
| <b>M1</b>             | 1223, 1377, 1578, 1612, 1694, 1740    |
| <b>M2</b>             | 1138, 1188, 1304, 1632, 1678, 1740    |
| <b>M3</b>             | 1501, 1543, 1612, 1651, 1694, 1728    |
| <b>M4</b>             | 980, 1188, 1501, 1616, 1694, 1740     |
| <b>M5</b>             | 1138, 1188, 1447, 1501, 1697, 1740    |

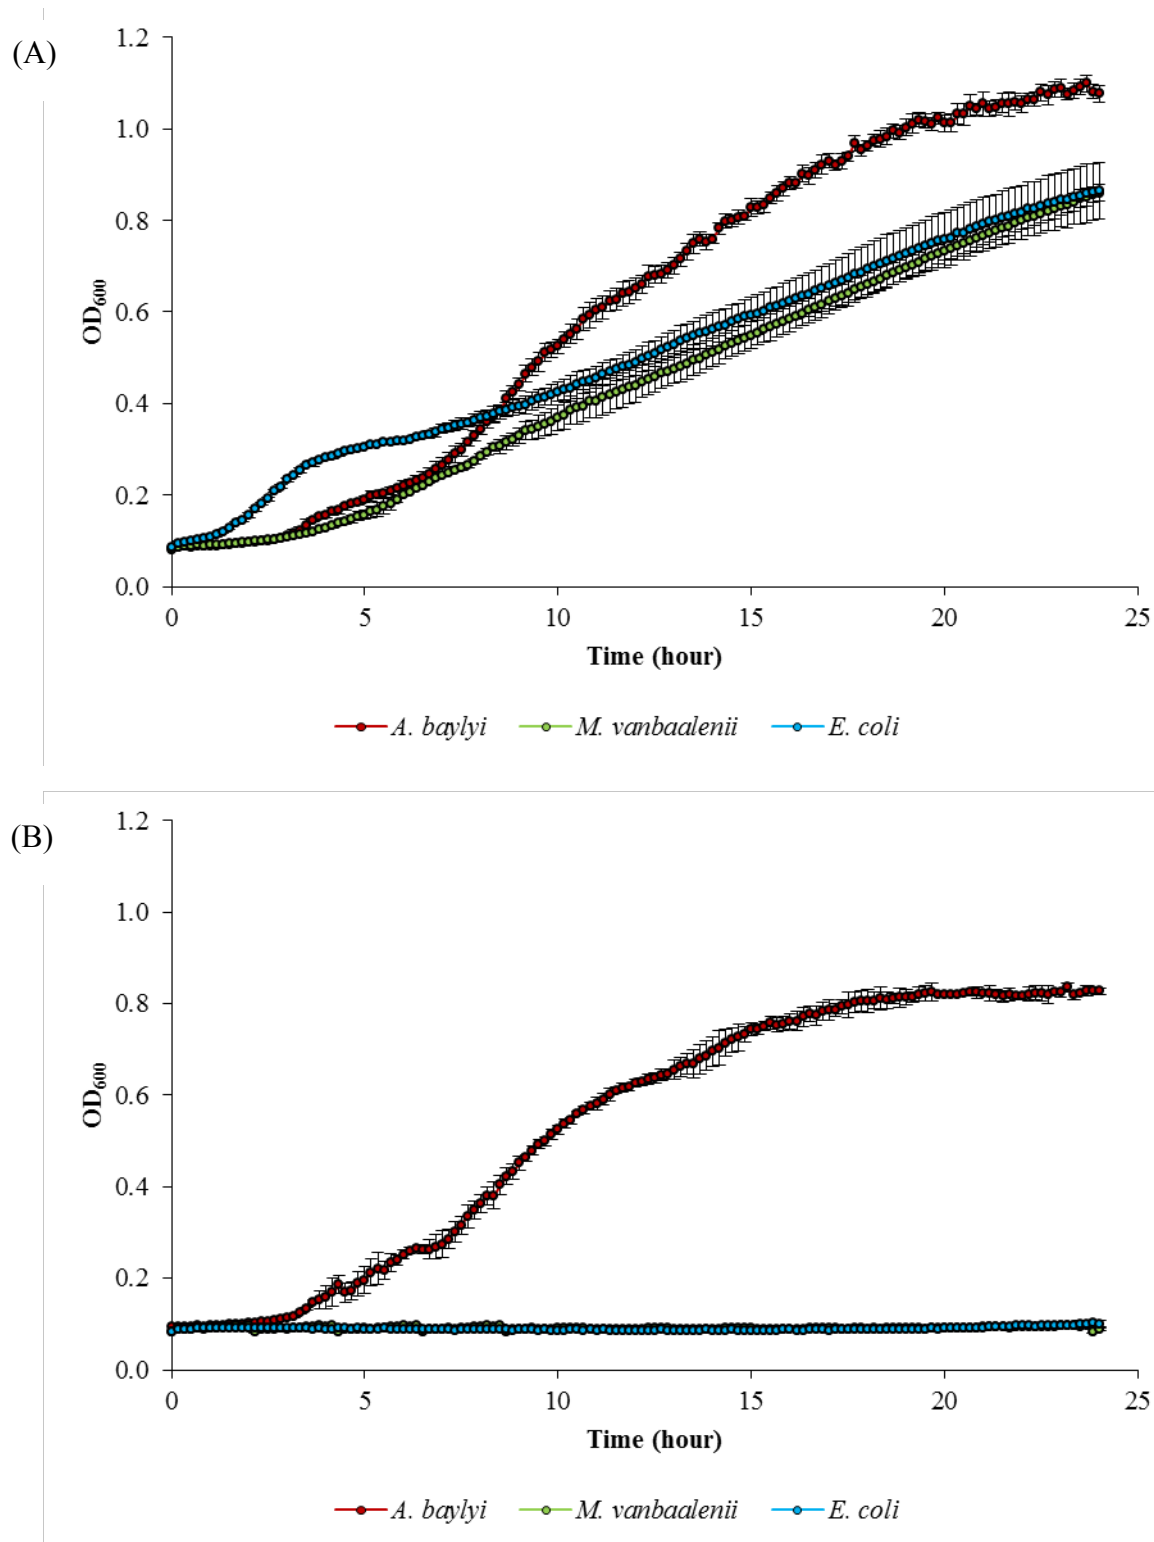

**Figure S1.** Growth curve of *Mycobacterium vanbaalenii* PYR-1, *Escherichia coli* DH5 $\alpha$  and *Acinetobacter baylyi* ADPWH\_recA in mineral medium without kanamycin pressure (A) or with 10 mg/L kanamycin (B).

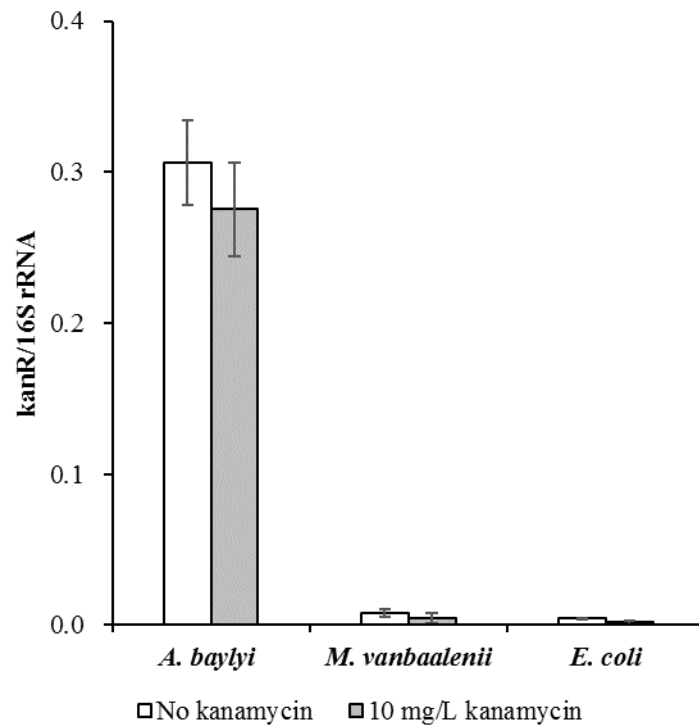

**Figure S2.** Relative abundance of kanamycin resistance gene (kanR/16S) in *Mycobacterium vanbaalenii* PYR-1, *Escherichia coli* DH5 $\alpha$  and *Acinetobacter baylyi* ADPWH\_recA after 16-h cultivation without kanamycin pressure or with 10 mg/L kanamycin. Data are presented in mean  $\pm$  standard error.

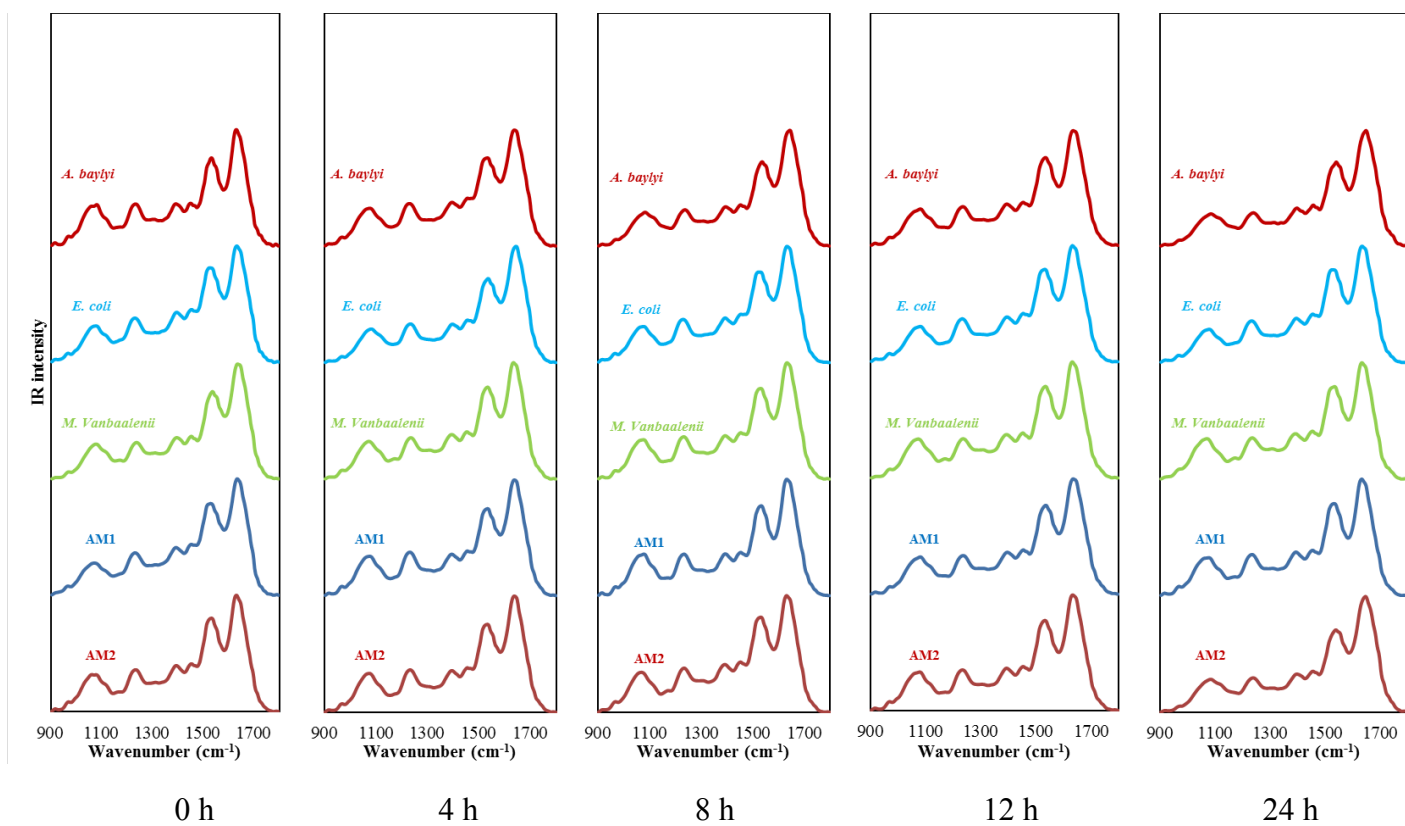

**Figure S3.** ATR-FTIR spectral dynamics of artificial microbiota.
